# Supplementary material for: Buoyant calving and ice-contact lake evolution at Pasterze Glacier (Austria) in the period 1998–2019
Source: Copernicus journal article supplement (doi:10.5194/tc-15-1237-2021), 2021-03-10
Supplement: Supplementary file 1 [file tc-15-1237-2021-supplement.zip]

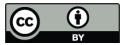

## *Supplement of*

# **Buoyant calving and ice-contact lake evolution at Pasterze Glacier (Austria) in the period 1998–2019**

**Andreas Kellerer-Pirklbauer et al.**

*Correspondence to:* Andreas Kellerer-Pirklbauer ([andreas.kellerer@uni-graz.at](mailto:andreas.kellerer@uni-graz.at))

- [tc-15-1237-2021-supplement-title-page.pdf](#)
- [S1\\_pasterze\\_terminus\\_1998-2019\\_EPSG25833.zip](#)
- [S2\\_pasterze\\_lake\\_evolution.mdb](#)
- [S3\\_lake\\_pasterzensee\\_bathymetry\\_data\\_20190913.txt](#)
- [S4\\_tc-2020-227\\_animation\\_lake\\_evolution\\_2010-2020.gif](#)
- [S5\\_tc-2020-227\\_animation\\_ice\\_breakup\\_20160920.gif](#)
- [S6\\_tc-2020-227\\_animation\\_lake\\_1998-2019\\_longitudinal.gif](#)
- [S7\\_tc-2020-227\\_animation\\_lake\\_1998-2018\\_lateral.gif](#)

The copyright of individual parts of the supplement might differ from the CC BY 4.0 License.
